# Supplementary material for: “Breathing” unimolecular micelles based on a novel star-like amphiphilic hybrid copolymer
Source: Royal Society of Chemistry journal article supplement (doi:10.1039/c5tb00415b), 2015-01-01
Supplement: c5tb00415b1.pdf [file c5tb00415b1.pdf]

## Supporting Information

### “Breathing” Unimolecular Micelles Based on Novel Star-like Amphiphilic Hybrid Copolymer

Xiaoshan Fan<sup>a</sup>, Zuo Wang<sup>b</sup>, Chaobin He<sup>\*ab</sup>

<sup>a</sup>Department of Materials Science and Engineering, National University of Singapore, 9 Engineering Drive 1, 117575 Singapore

E-mail: msehc@nus.edu.sg or cb-he@imre.a-star.edu.sg.

<sup>b</sup>Institute of Materials Research and Engineering, 3 Research Link, Singapore 117602

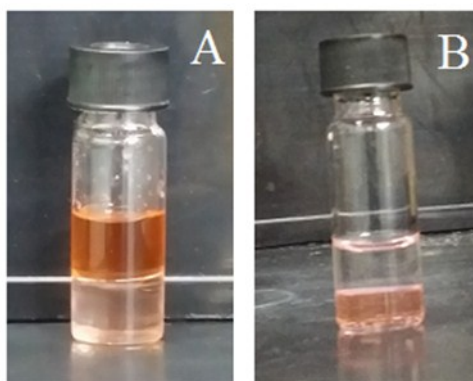

**Figure S1.** The DOX.HCl aqueous solution (up) and chloroform (bottom) (A); water (up) and the DOX.HCl-loaded chloroform solution (bottom) (B).

From Figure 5S A, it confirmed that the DOX.HCl is perfectly soluble in water, not chloroform phase; Figure 5S B demonstrated that the DOX.HCl has efficiently been loaded into the hybrid copolymer POSS-(PAA-(PLLA-OH)<sub>4</sub>)<sub>8</sub>. Otherwise, the DOX.HCl will be transferred to upper water phase.

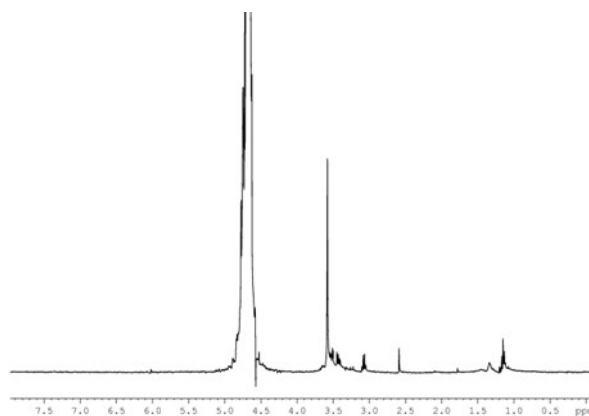

**Figure S2.** The <sup>1</sup>H NMR spectrum of the DOX.HCl-loaded micelles of POSS-(PAA-(PLLA-OH)<sub>4</sub>)<sub>8</sub> in D<sub>2</sub>O.

In Figure S6, the characteristic signals of DOX.HCl can't be seen completely, indicating they were encapsulated into inner PAA aqueous core
